# Supplementary material for: Targeting cancer stem cell propagation with palbociclib, a CDK4/6 inhibitor: Telomerase drives tumor cell heterogeneity
Source: PubMed Central journal article supplement (PMC5354777; doi:10.18632/oncotarget.14196), 2016-12-25
Supplement: oncotarget-08-9868-s001.pdf [file oncotarget-08-9868-s001.pdf]

## **Targeting cancer stem cell propagation with palbociclib, a CDK4/6 inhibitor: Telomerase drives tumor cell heterogeneity**

### **SUPPLEMENTARY TABLE**

**Supplementary Table 1: Molecules Commonly Upregulated in hTERT-GFP(+) Ovarian, Lung and Breast CSCs**

See Supplementary File 1
